# Supplementary material for: Genetic Diversity and Population Structure Patterns in Chinese Cherry (Prunus pseudocerasus Lindl) Landraces
Source: Springer Nature journal article supplement (doi:10.1007/s11105-015-0934-2), 2015-09-11
Supplement: 11105_2015_934_MOESM1_ESM.pdf [file 11105_2015_934_MOESM1_ESM.pdf]

## Supplementary material

Table S1 Microsatellite pair sequences, expected and observed product size, and chromosomal location in the present study

| Microsatellite loci Name | Primer sequences                                        | Product size in references (bp) | Observed product size (bp) | Chromal location * | Annealing temperature (°C) | References             |
|--------------------------|---------------------------------------------------------|---------------------------------|----------------------------|--------------------|----------------------------|------------------------|
| EMPA026                  | ATTGAAAAAGCCAAAGAGCG<br>TTCACGGTTTGAAGCAAGTG            | 219                             | 190-219                    | 8                  | 55                         |                        |
| EMPA027                  | GCCAACACCCAAATGGTTAG<br>CTCTCCACGGTCTTGCTTTC            | 210                             | 198-225                    | 7                  | 55                         | Clarke, 2009           |
| EMPA029                  | GCTGCTGATTGTCTGTGGTC<br>CAAACCCCTCTTCTTCCAC             | 137                             | 126-137                    | 6                  | 55                         |                        |
| EMPaS02                  | CTACTTCCATGATTGCCTCAC<br>AACATCCAGAACATCAACACAC         | 133-145                         | 136-160                    | 3                  | 55                         |                        |
| EMPaS06                  | AAGCGGAAAGCACAGGTAG<br>TTGCTAGCATAGAAAAGAATTGTAG        | 200-218                         | 222-237                    | 4                  | 55                         | Vaughan & Ussell, 2004 |
| EMPaS10                  | GCTAATATCAAATCCCAGCTCTC<br>TGAAGAAGTATGGCTTCTGTGG       | 151-183                         | 153-183                    | 4                  | 55                         |                        |
| UDP96-005                | GTAACGCTCGCTACCACAAA<br>CCTGCATATCACCAACCCAG            | 155                             | 98-126                     | 1                  | 55                         | Cipriani, 1999         |
| pchgms1                  | GGGTAAATATGCCCATTTGTGCAATC<br>GGATCATTGAACTACGTCAATCCTC | 194                             | 183-202                    | 2                  | 55                         | Sosinski, 2000         |
| UCD-CH18                 | GATGGAAGGCCAAGGCAAC<br>AATGTTCCCGTTATATGC               | 178/184<br>186/188              | 160-188                    | 4                  | 55                         |                        |
| UCD-CH31                 | TCCGCTTCTCTGTGAGTGTG<br>CGATAGTTTCCCTTCCAGACC           | 111/123<br>125/148              | 80-118                     | 1                  | 55                         | Struss, 2003           |
| UCD-CH12                 | AGACAAAGGGATTGTGGGC<br>TTTCTGCCACAAACCTAATGG            | 173/175/177/<br>180/120         | 175-198                    | 2                  | 55                         |                        |
| UCD-CH39                 | CACTGTCTCCAGTTAAACTC<br>CCTGAGCTTTTGACACATGC            | 122/142/<br>144/146             | 133-164                    | 7                  | 55                         |                        |
| BPPCT040                 | ATGAGGACGTGTCTGAATGG<br>AGCCAAACCCCTCTTATACG            | 135                             | 124-149                    | 4                  | 55                         | Dirlewanger, 2002      |
| BPPCT013                 | ACCCACAAATCAAGCATATCC<br>AGCTTCAGCCACCAAGC              | 183                             | 154-166                    | 2/4                | 55                         |                        |
| CPSCT012                 | ACGGGAGACTTTCCAGAAAG<br>CTTCTCGTTTCCCTCCCTCT            | 156                             | 150-172                    | 5                  | 55                         | Mnejja, 2004           |
| M01a                     | CACGAGGCGCCATTTCTACG<br>GTACGACGGGTTTTGGCTCA            | 80                              | 75-90                      | 2                  | 55                         |                        |
| M12a                     | AGGTGCCTCATCTTCTTCTTTG<br>GTGTGGTGAGGGGTGAGAGC          | 197/177                         | 177-200                    | 4                  | 55                         | Yamanoto, 2002         |
| MA006                    | ACAACCTACCATTGAGGCT<br>CAATCATTCAAGCTCTCTCC             | 295/301                         | 129-156                    | 5                  | 55                         |                        |
| MA027a                   | GGCAGTGAAGAATCTATGA<br>GATAGCATAAACCCCGTGAA             | 147/151                         | 130-159                    | 6                  | 55                         |                        |
| PMS2                     | CACTCTCTCCAGTTAAACT<br>CCTGAGCTTTTGACACATGC             | 132-152                         | 143-164                    | 7                  | 55                         | Cantini, 2001          |

\* Chromosomal location was determined by referring a linkage map of sweet cherry (Clarke, 2009)

**Table S2** Characteristic statistics of 20 microsatellite loci used in the study

| Loci Name | <i>Na</i> | <i>RA</i> | <i>MAF</i> | <i>Ne</i> | <i>Ho</i> | <i>He</i> | <i>I</i> | <i>PIC</i> | <i>f</i> | <i>BI</i> |
|-----------|-----------|-----------|------------|-----------|-----------|-----------|----------|------------|----------|-----------|
| EMPA026   | 5         | 2         | 0.423      | 3.074     | 0.482     | 0.678     | 1.251    | 0.616      | 0.278*   | 0.111     |
| EMPA027   | 6         | 2         | 0.348      | 3.594     | 0.648     | 0.725     | 1.379    | 0.670      | 0.094    | 0.038     |
| EMPA029   | 4         | 1         | 0.485      | 2.805     | 0.812     | 0.646     | 1.146    | 0.579      | - 0.260  | - 0.103   |
| EMPaS02   | 10        | 7         | 0.381      | 3.346     | 0.633     | 0.704     | 1.486    | 0.651      | 0.102    | 0.040     |
| EMPaS06   | 6         | 3         | 0.736      | 1.767     | 0.286     | 0.436     | 0.899    | 0.407      | 0.345*   | 0.103     |
| EMPaS10   | 10        | 6         | 0.418      | 3.720     | 0.508     | 0.734     | 1.586    | 0.694      | 0.309*   | 0.129     |
| UDP96-005 | 5         | 2         | 0.443      | 2.608     | 0.829     | 0.619     | 1.096    | 0.539      | 0.444*   | 0.176     |
| pchgms1   | 8         | 5         | 0.407      | 3.481     | 0.449     | 0.716     | 1.445    | 0.662      | - 0.341  | - 0.132   |
| UCD-CH18  | 6         | 3         | 0.597      | 2.412     | 0.310     | 0.588     | 1.168    | 0.549      | 0.624*   | 0.242     |
| UCD-CH31  | 8         | 4         | 0.525      | 2.936     | 0.372     | 0.662     | 1.397    | 0.631      | 0.360*   | 0.148     |
| UCD-CH12  | 8         | 5         | 0.507      | 2.760     | 0.241     | 0.640     | 1.260    | 0.581      | - 0.060  | - 0.025   |
| UCD-CH39  | 5         | 2         | 0.450      | 2.717     | 0.672     | 0.635     | 1.153    | 0.561      | 0.490*   | 0.181     |
| BPPCT040  | 6         | 3         | 0.687      | 1.934     | 0.374     | 0.485     | 0.941    | 0.440      | 0.229*   | 0.073     |
| BPPCT013  | 4         | 1         | 0.688      | 1.905     | 0.496     | 0.477     | 0.841    | 0.425      | - 0.038  | - 0.014   |
| CPSCT012  | 6         | 4         | 0.526      | 2.221     | 0.555     | 0.552     | 0.949    | 0.453      | - 0.005  | - 0.003   |
| M01a      | 6         | 2         | 0.604      | 2.421     | 0.468     | 0.589     | 1.176    | 0.551      | 0.207*   | 0.075     |
| M12a      | 5         | 2         | 0.408      | 3.016     | 0.691     | 0.671     | 1.176    | 0.601      | - 0.030  | - 0.014   |
| PMS2      | 5         | 1         | 0.469      | 3.298     | 0.372     | 0.700     | 1.362    | 0.652      | 0.478*   | 0.195     |
| MA006     | 5         | 1         | 0.580      | 2.180     | 0.730     | 0.543     | 0.921    | 0.455      | - 0.336  | - 0.119   |
| MA027a    | 8         | 0         | 0.227      | 6.610     | 0.500     | 0.854     | 1.977    | 0.831      | 0.416*   | 0.189     |
| Mean      | 6         | 3         | 0.495      | 2.940     | 0.521     | 0.633     | 1.230    | 0.577      | 0.177    | 0.065     |

*Na* Observed number of alleles, *RA* rare alleles, *He* expected heterozygosity, *MAF* Major allele frequency, *Ne* Effective number of alleles, *Ho* Observed heterozygosity, *He* Nei's expected heterozygosity, *I* Shannon's Information index, *PIC* Polymorphism information content, *f* inbreeding coefficient (loci deviated from Hardy-Weinberg equilibrium at  $P < 0.05$ ), *BI* null allele frequency averaged over all populations (Brookfield method). \*  $P < 0.05$ .

**Table S3** Pairwise  $F_{st}$  values (below diagonal) and significant test  $P$  value (above diagonal) among 17 *Prunus pseudocerasusu* landraces populations

|    | YA      | MS      | PJ      | JY      | XC      | SM      | BC      | CQ      | SN      | FP      | HZ      | XX      | GY      | BJ      | TH     | TS    | WF    |
|----|---------|---------|---------|---------|---------|---------|---------|---------|---------|---------|---------|---------|---------|---------|--------|-------|-------|
| YA |         | 0.027   | 0.018   | 0.009   | 0.000   | 0.000   | 0.027   | 0.405   | 0.000   | 0.009   | 0.000   | 0.009   | 0.000   | 0.000   | 0.000  | 0.009 | 0.000 |
| MS | 0.056*  |         | 0.577   | 0.739   | 0.027   | 0.198   | 0.009   | 0.036   | 0.054   | 0.099   | 0.018   | 0.090   | 0.000   | 0.009   | 0.000  | 0.009 | 0.000 |
| PJ | 0.060*  | 0.026   |         | 0.486   | 0.000   | 0.153   | 0.000   | 0.081   | 0.072   | 0.739   | 0.000   | 0.216   | 0.000   | 0.018   | 0.018  | 0.018 | 0.018 |
| JY | 0.144** | 0.056   | 0.025   |         | 0.018   | 0.009   | 0.000   | 0.009   | 0.018   | 0.045   | 0.099   | 0.126   | 0.009   | 0.000   | 0.000  | 0.009 | 0.000 |
| XC | 0.208** | 0.108*  | 0.167** | 0.132*  |         | 0.000   | 0.000   | 0.000   | 0.000   | 0.009   | 0.000   | 0.000   | 0.000   | 0.000   | 0.000  | 0.009 | 0.000 |
| SM | 0.095** | 0.022   | 0.044   | 0.097** | 0.180** |         | 0.018   | 0.000   | 0.045   | 0.072   | 0.036   | 0.054   | 0.000   | 0.000   | 0.000  | 0.000 | 0.000 |
| BC | 0.089*  | 0.106** | 0.174** | 0.291** | 0.276** | 0.060*  |         | 0.081   | 0.000   | 0.000   | 0.081   | 0.036   | 0.000   | 0.000   | 0.000  | 0.018 | 0.000 |
| CQ | 0.029   | 0.060*  | 0.027   | 0.153** | 0.211** | 0.070** | 0.014   |         | 0.000   | 0.063   | 0.027   | 0.054   | 0.000   | 0.000   | 0.000  | 0.000 | 0.000 |
| SN | 0.317** | 0.154   | 0.194   | 0.245*  | 0.249** | 0.087*  | 0.229** | 0.222** |         | 0.027   | 0.820   | 0.054   | 0.000   | 0.009   | 0.018  | 0.135 | 0.000 |
| FP | 0.084** | 0.060   | 0.047   | 0.133*  | 0.206** | 0.067   | 0.107** | 0.020   | 0.149*  |         | 0.009   | 0.126   | 0.000   | 0.036   | 0.009  | 0.027 | 0.009 |
| HZ | 0.410** | 0.229*  | 0.268** | 0.316   | 0.277** | 0.167*  | 0.369   | 0.308*  | 0.081   | 0.230** |         | 0.009   | 0.000   | 0.009   | 0.000  | 0.000 | 0.000 |
| XX | 0.190** | 0.062   | 0.042   | 0.128   | 0.205** | 0.072   | 0.180*  | 0.106   | 0.107   | 0.095   | 0.181** |         | 0.000   | 0.045   | 0.153  | 0.144 | 0.216 |
| GY | 0.408** | 0.274** | 0.245** | 0.341** | 0.347** | 0.233** | 0.376** | 0.325** | 0.162** | 0.228** | 0.191** | 0.117** |         | 0.090   | 0.144  | 0.000 | 0.000 |
| BJ | 0.240** | 0.178** | 0.099*  | 0.213** | 0.271** | 0.156** | 0.248** | 0.181** | 0.117** | 0.087*  | 0.128** | 0.075*  | 0.045   |         | 0.018  | 0.000 | 0.000 |
| TH | 0.317** | 0.161** | 0.130*  | 0.201** | 0.268** | 0.154** | 0.299** | 0.235** | 0.064*  | 0.153** | 0.124** | 0.035   | 0.037   | 0.052*  |        | 0.036 | 0.216 |
| TS | 0.334** | 0.164** | 0.224*  | 0.227** | 0.226** | 0.141** | 0.319*  | 0.272** | 0.097   | 0.250*  | 0.184** | 0.108   | 0.189** | 0.163** | 0.094* |       | 0.081 |
| WF | 0.206** | 0.098** | 0.085*  | 0.139** | 0.181** | 0.106** | 0.194** | 0.157** | 0.092** | 0.119** | 0.163** | 0.015   | 0.084** | 0.091** | 0.001  | 0.028 |       |

Statistical significance test (\*significant difference  $P<0.05$ , \*\* Significant differences  $P<0.01$ )

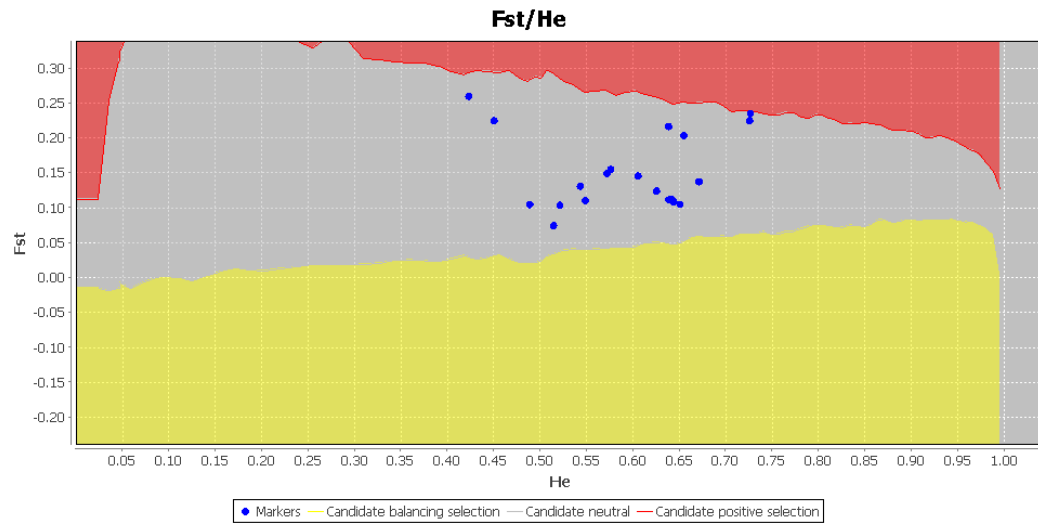

**Fig. S1** The neutral evolution test of the whole 20 microsatellite loci detected by java workbench Lositan.

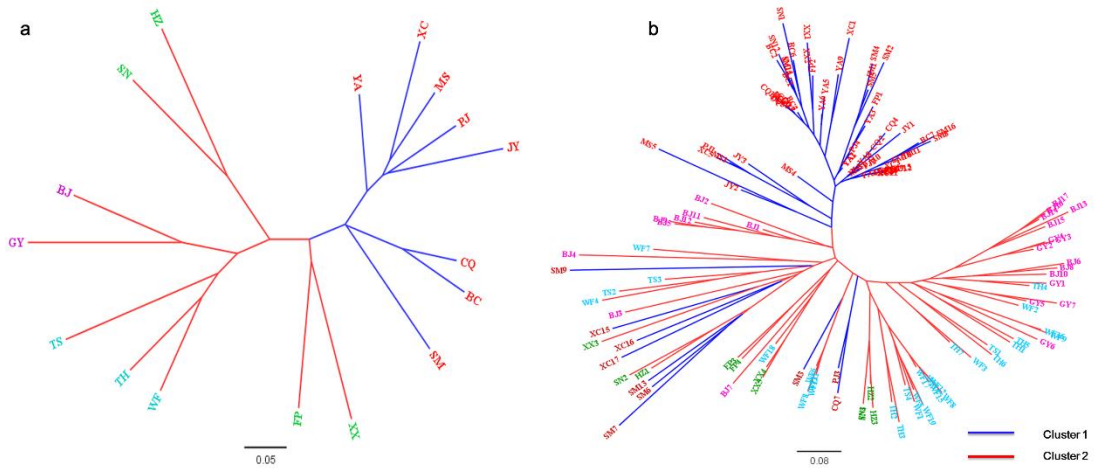

**Fig. S2** Unrooted neighbor joining tree of 17 populations **(a)** and 140 individuals **(b)** of *Prunus pseudocerasus* landrace. Branch with red and blue lines represent the two clusters based on STRUCTURE analysis and population cluster. The individuals were sorted according to population code with red, green, purple and blue colors represent the SC, QL, YG and NC regions respectively as shown in Table 1

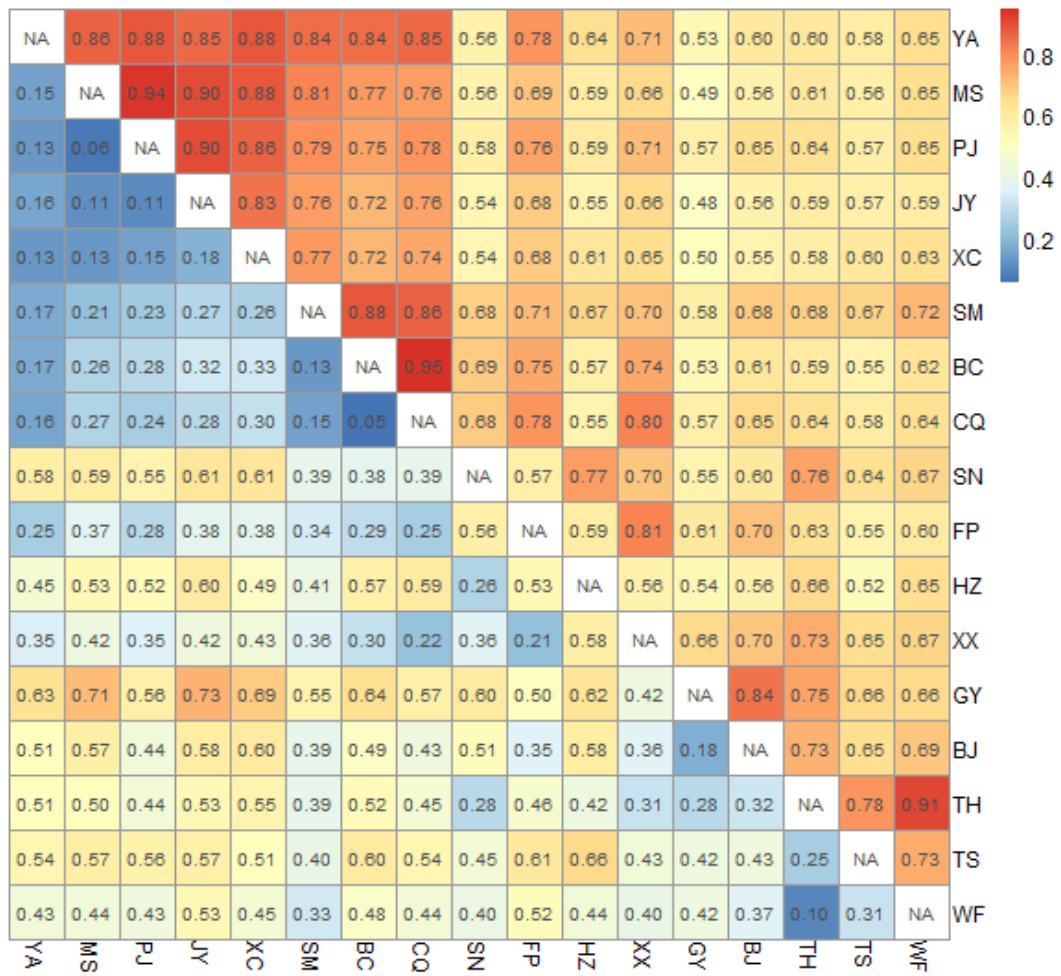

**Fig. S3** Heat map of genetics identify (above diagonal) and genetics distance (below diagonal) among 17 *Prunus pseudocerasus* populations
